# Supplementary material for: Conservation and divergence of bHLH genes in the calcisponge Sycon ciliatum
Source: PubMed Central journal article supplement (PMC5064789; doi:10.1186/s13227-016-0060-8), 2016-10-14

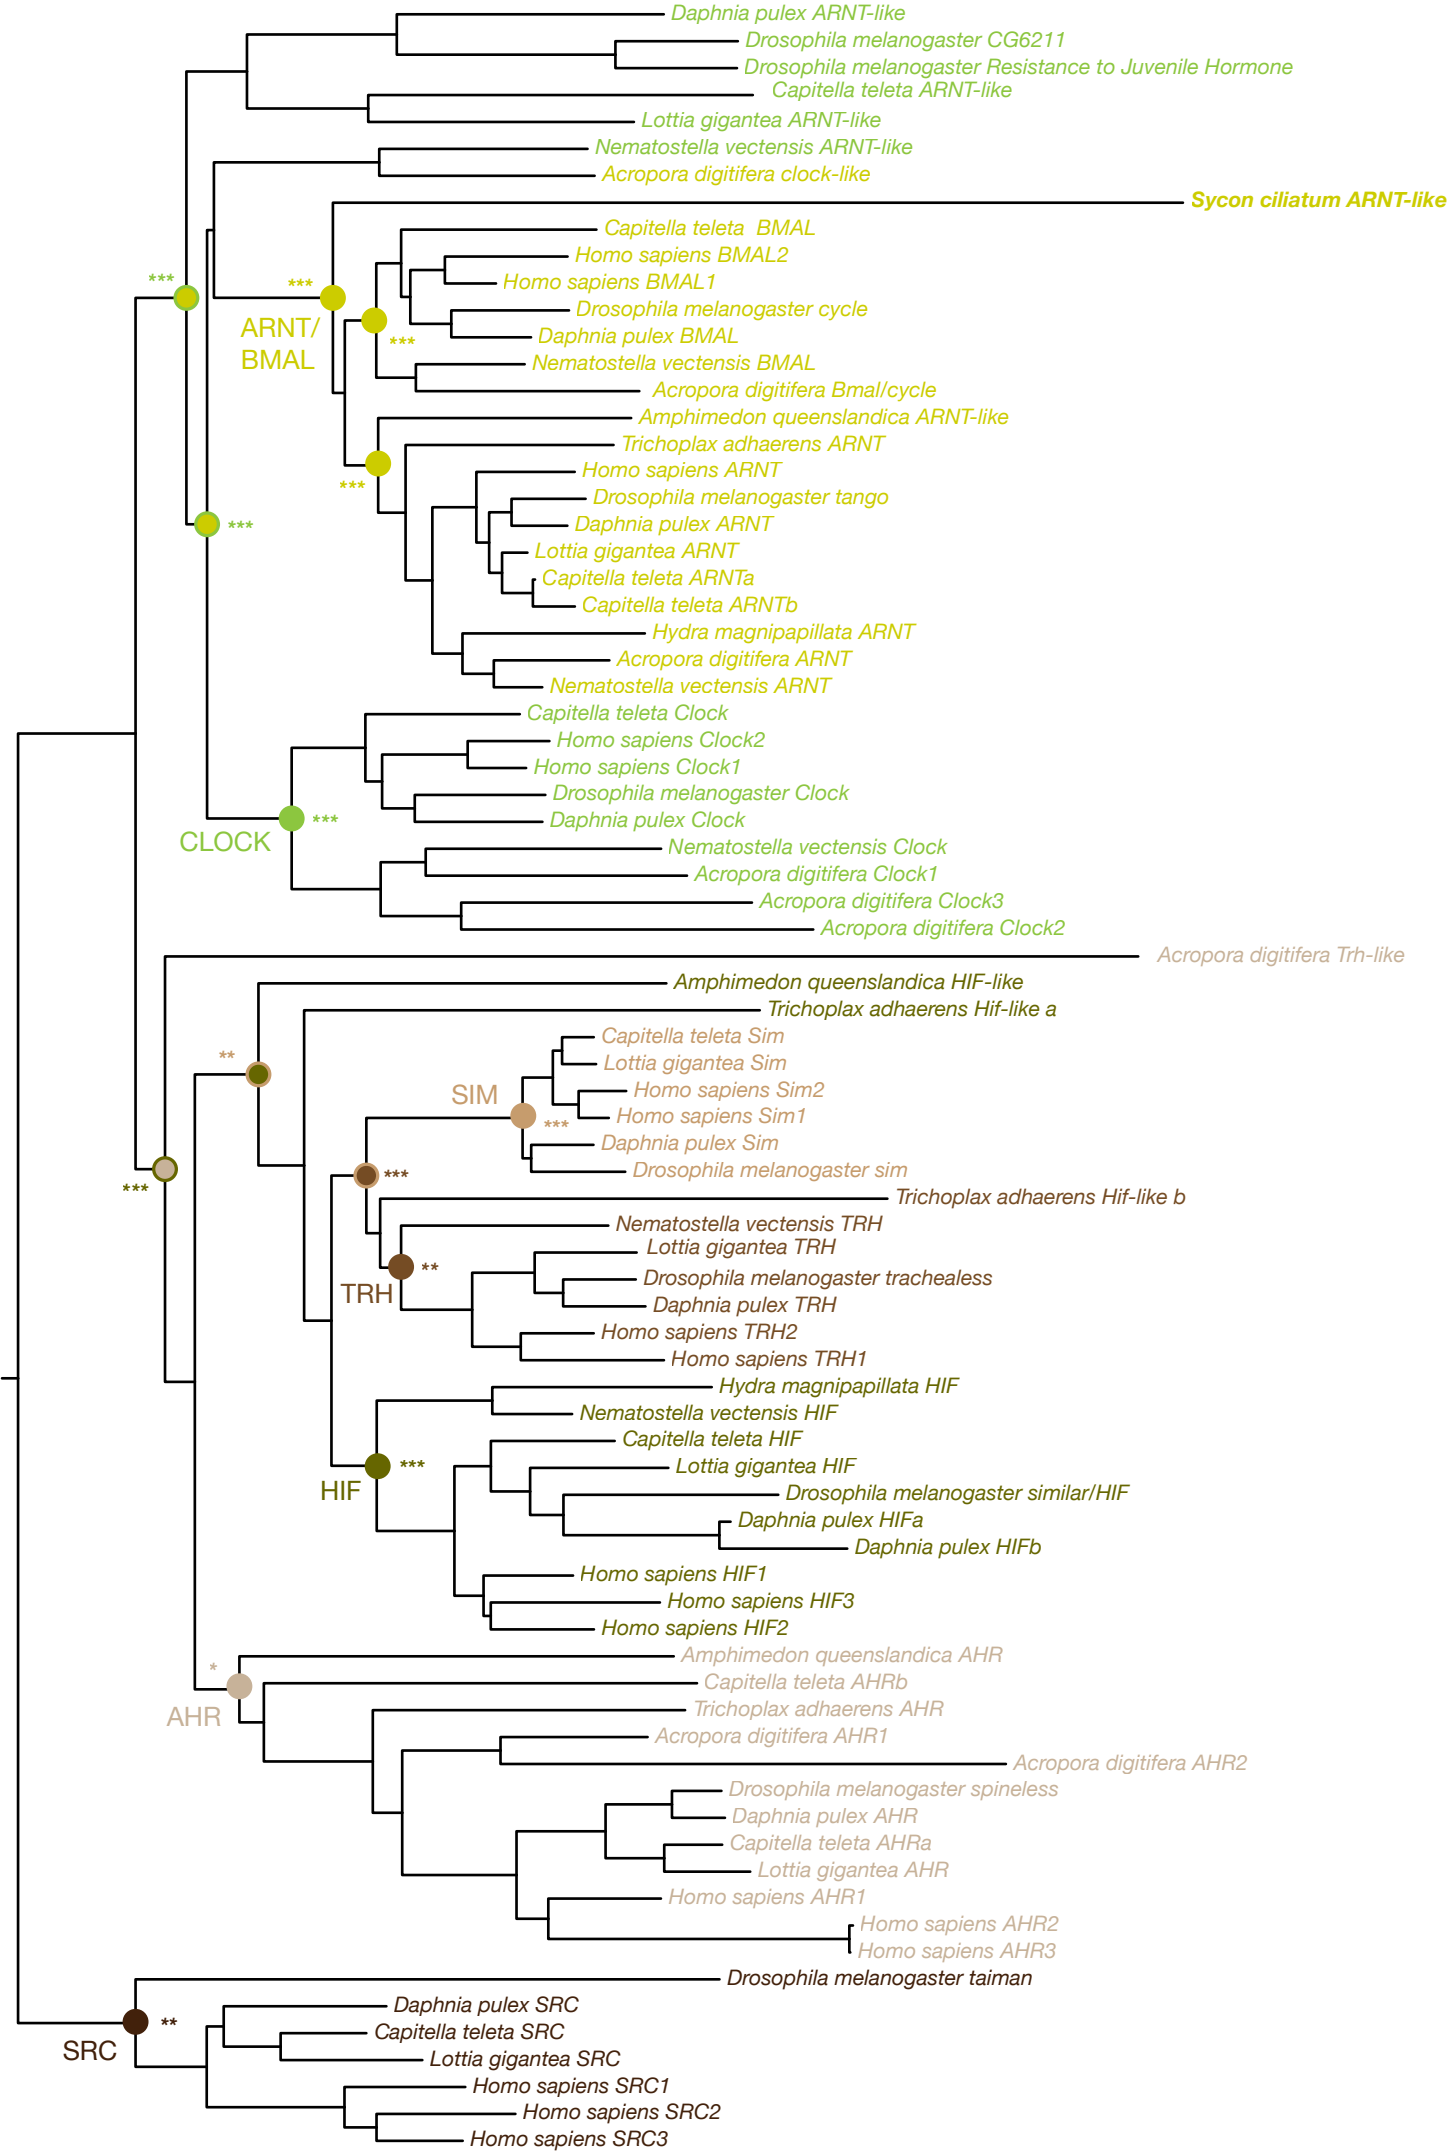

Supplement: 13227_2016_60_MOESM10_ESM.pdf [file 13227_2016_60_MOESM10_ESM.pdf]
